# Supplementary material for: Arrays of graphene-quantum dots-supported DNA oligonucleotides as self-indicating porphyrin carriers
Source: Royal Society of Chemistry journal article supplement (doi:10.1039/d3nj03280a), 2023-01-01
Supplement: d3nj03280a1.pdf [file d3nj03280a1.pdf]

## SUPPORTING INFORMATION

### **Arrays of graphene-quantum dots-supported DNA oligonucleotides as self-indicating porphyrin carriers**

Ana R. Monteiro,<sup>a,b</sup> Catarina I. V. Ramos,<sup>\*a</sup> Sara Fateixa,<sup>b</sup> Maria G.P.M.S. Neves<sup>a</sup> and Tito Trindade<sup>\*b</sup>

<sup>a</sup>LAQV – Requimte, Department of Chemistry, University of Aveiro, 3810-193 Aveiro, Portugal

<sup>b</sup>CICECO – Aveiro Institute of Materials, Department of Chemistry - University of Aveiro, 3810-193 Aveiro, Portugal

E-mail: [c.ramos@ua.pt](mailto:c.ramos@ua.pt); [tito@ua.pt](mailto:tito@ua.pt)

## SUPPORTING INFORMATION

### TABLE OF CONTENTS

|                                                                                          |           |
|------------------------------------------------------------------------------------------|-----------|
| <b>1. Calibration curve of TMPyP in Tris-KCl buffer .....</b>                            | <b>2</b>  |
| <b>2. Optical and structural characterization of GQDs.....</b>                           | <b>2</b>  |
| <b>3. Design, functionalization and characterization of GQDs-DNA bioconjugates .....</b> | <b>4</b>  |
| <b>4. GQDs-DNA bioconjugates as self-indicating TMPyP carriers .....</b>                 | <b>13</b> |

## 1. Calibration curve of TMPyP in Tris-KCl buffer

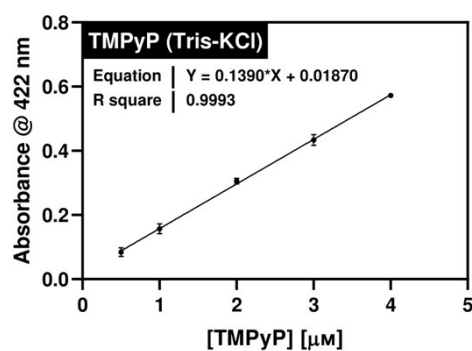

Fig. S1. a) Calibration curve of TMPyP (concentration 0.5-4  $\mu\text{M}$ ) in Tris-KCl buffer at room temperature (RT), according to the absorbance values at 422.

## 2. Optical and structural characterization of QGDs

Table S1. Major FTIR vibrations and assignments of QGDs.

| QGDs |            | Assignment                       | Ref. |
|------|------------|----------------------------------|------|
| Blue | Aqua green |                                  |      |
| 3343 | 3343       | $\nu\text{NH}_2$                 | 1    |
| 3200 | 3200       | $\nu\text{OH}$                   | 1,2  |
| 2943 | 2943       | $\nu\text{C-H}$                  | 1,2  |
| 1650 | 1650       | $\nu\text{C=O}$                  | 2,3  |
| 1549 | 1556       | $\nu\text{C-C}$ (aromatic rings) | 2    |
| -    | 1489       | C-C=N-benzene                    | 4    |
| 1389 | 1385       | $\nu\text{C-O}$ (alkoxy)         | 2    |
| 1334 | 1334       | $\delta\text{O-H}$ (phenol)      | 5    |
| 1221 | 1227       | $\nu\text{C-H}$                  | 6    |
| 1045 | 1078       | $\nu\text{C-O}$ (epoxy)          | 7    |

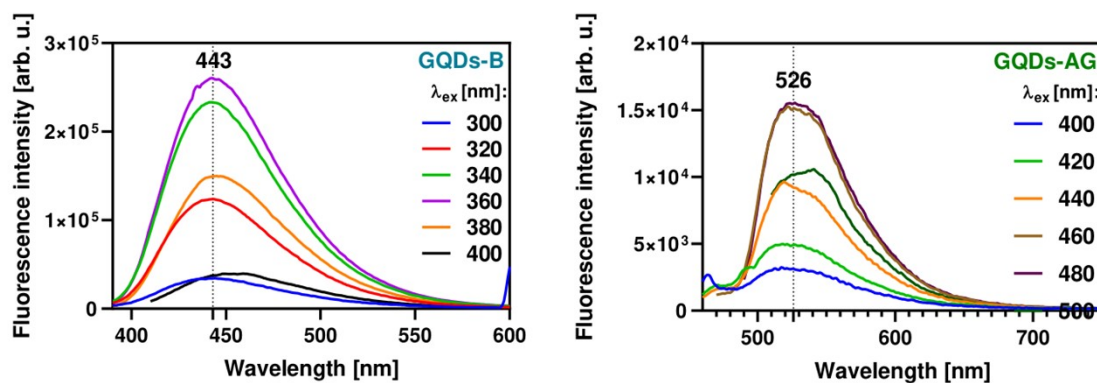

**Fig. S2.** Fluorescence emission spectra of 1  $\mu\text{g}/\text{mL}$  in Milli-Q water (at RT) of a) GQDs-B and b) GQDs-AG upon excitation at different  $\lambda_{ex}$ .

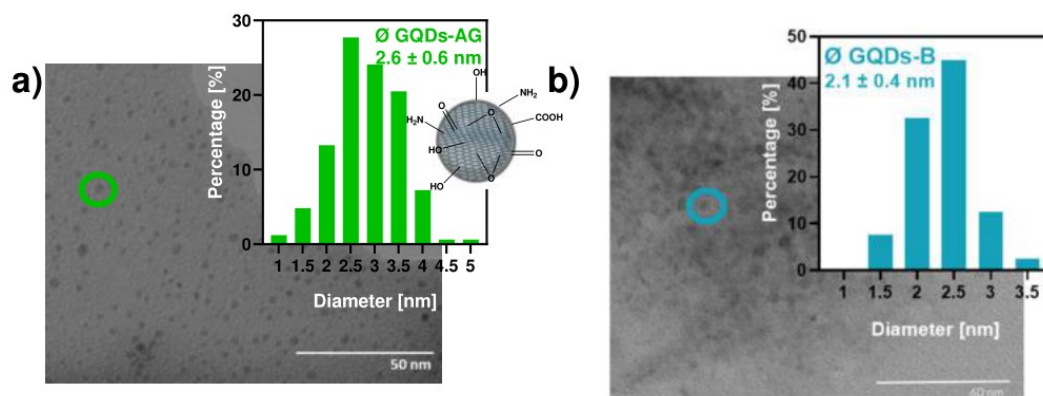

**Fig. S3.** STEM image of a) GQDs-AG and b) GQDs-B. The green and blue circles highlight individual GQDs and the insets show the size distribution histograms with the respective average diameter ( $\phi$ ).

### 3. Design, functionalization and characterization of GQDs-DNA bioconjugates

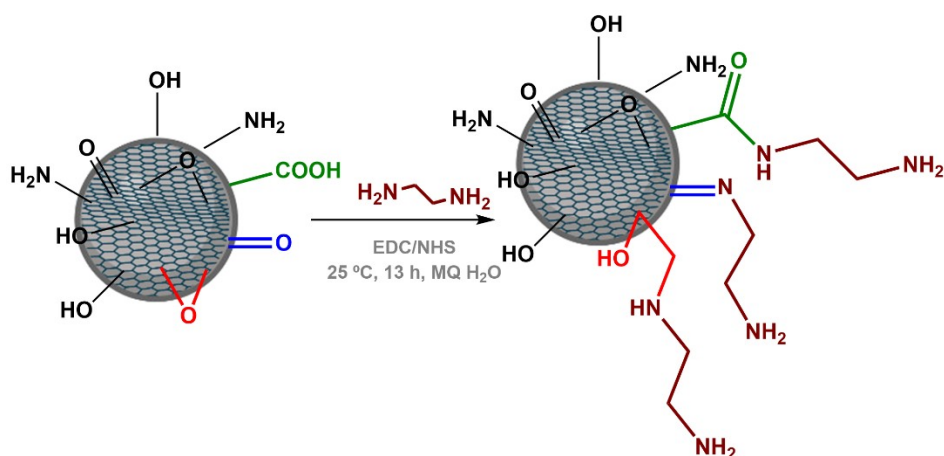

**Scheme S1.** Functionalization of GQDs with ethylenediamine via different surface groups.

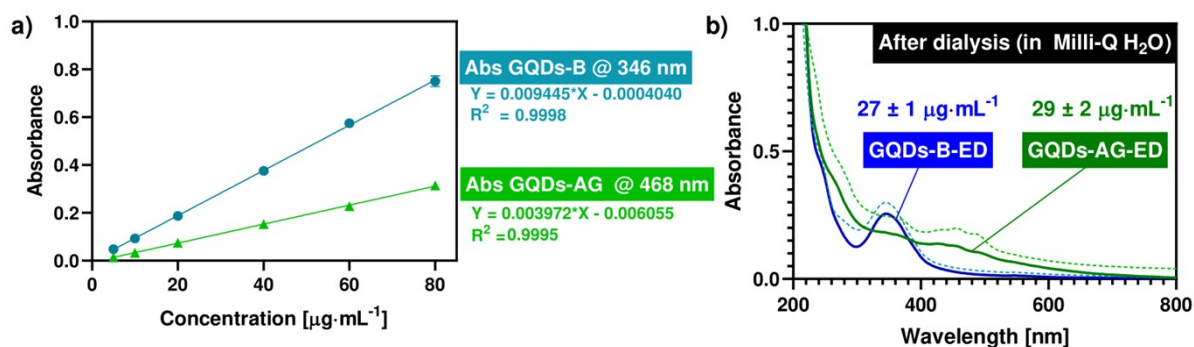

**Fig. S4.** a) Calibration curves of GQDs' concentration (0-80 µg/mL) in Milli-Q water at RT, according to the absorbance values at 346 nm (for B) and at 468 nm (for AG). b) UV-VIS absorption spectra of B-ED and AG-ED in Milli-Q water after dialysis. The dashed lines correspond to the respective controls (without ED). The average concentration of the samples was estimated from the calibration curves of a).

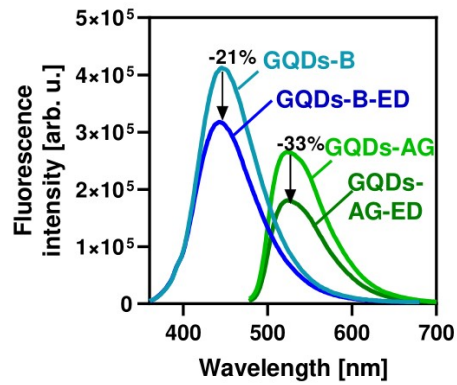

**Fig. S5.** Fluorescence spectra of GQDs-B and GQDs-B-ED ( $\lambda_{\text{ex}} = 346 \text{ nm}$ ) and of GQDs-AG and GQDs-AG-ED ( $\lambda_{\text{ex}} = 468 \text{ nm}$ ) in Tris-KCl at RT.

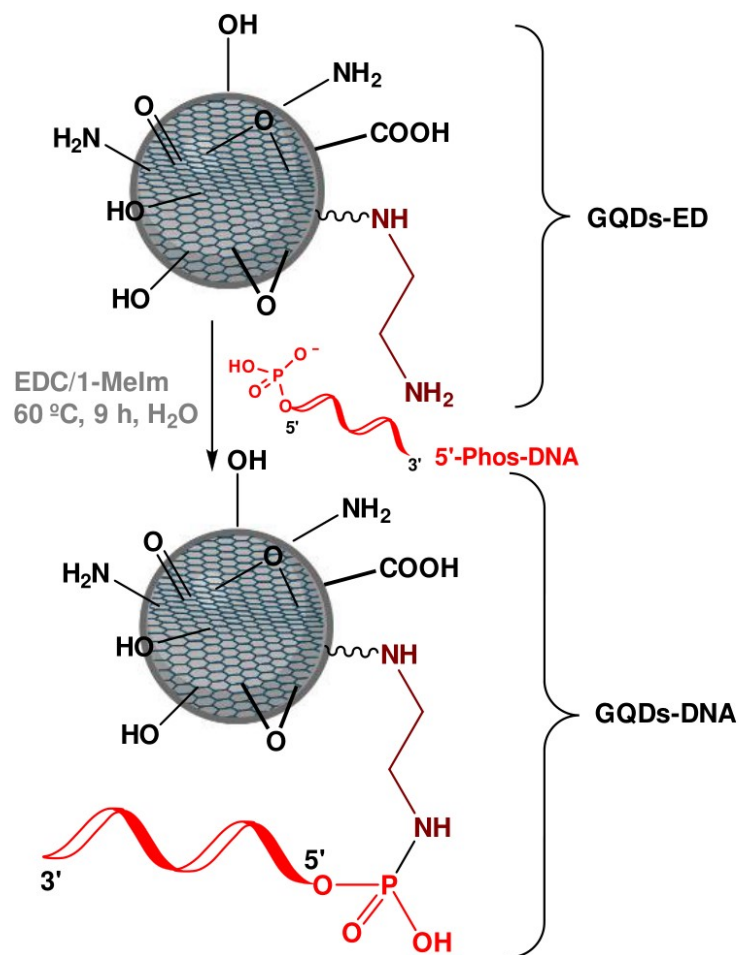

**Scheme S2.** Functionalization of GQDs-ED with 5'-Phos-DNA oligonucleotides.

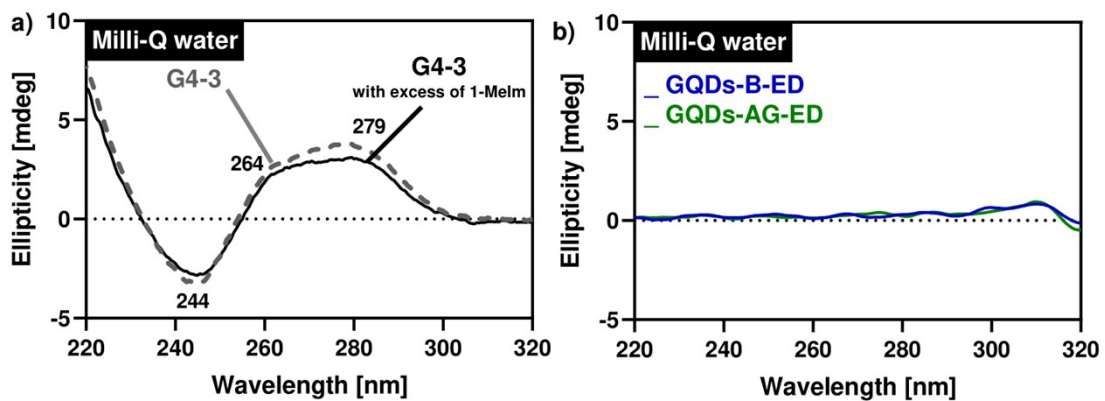

**Fig. S6.** Control experiments to assess the influence of reactants on the secondary structure of DNA oligonucleotides. a) CD spectra of G4-3 and G4-3 with 1-Melm (40  $\mu$ L, 20 mM) in Milli-Q water. b) CD spectra of GQDs-B/AG-ED ( $\sim$ 30  $\mu$ g/mL) in Milli-Q water. The experiments were carried out at 20  $^{\circ}$ C.

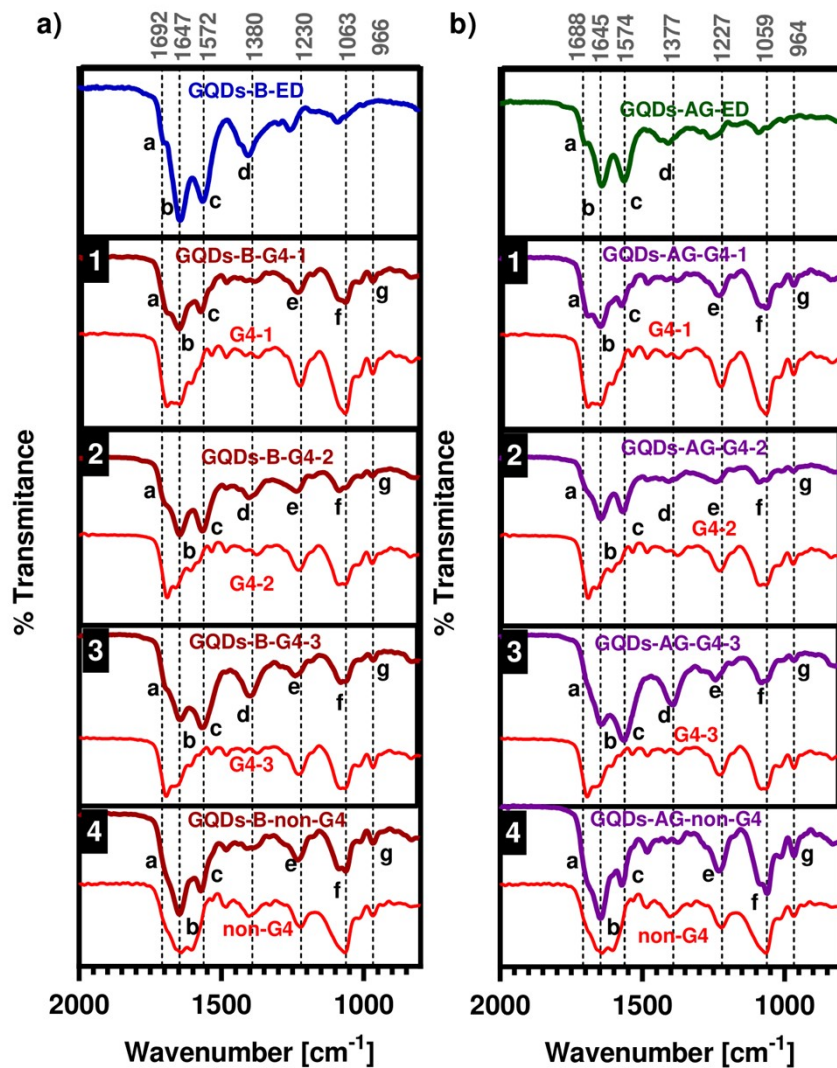

**Fig. S7.** FTIR spectra of 5'-Phos-DNA oligonucleotides (G4-1 to non-G4) and their bioconjugates with a) GQDs-B-ED and b) GQDs-AG-ED. As a reference, the wavenumbers from the main bands of GQDs-B/AG-G4 are assigned with the letters a-g.

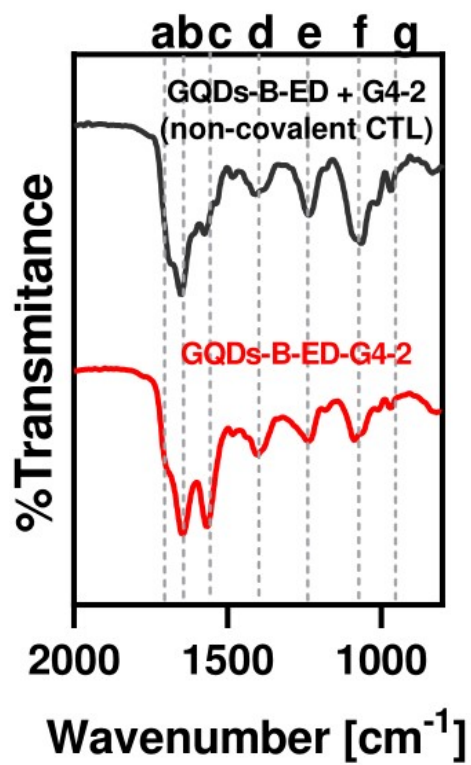

**Fig. S8.** FTIR spectra of GQDs-B-ED-G4-2 (red line) and from the non-covalent mixture of GQDs-B-ED with G4-2 (control, black line).



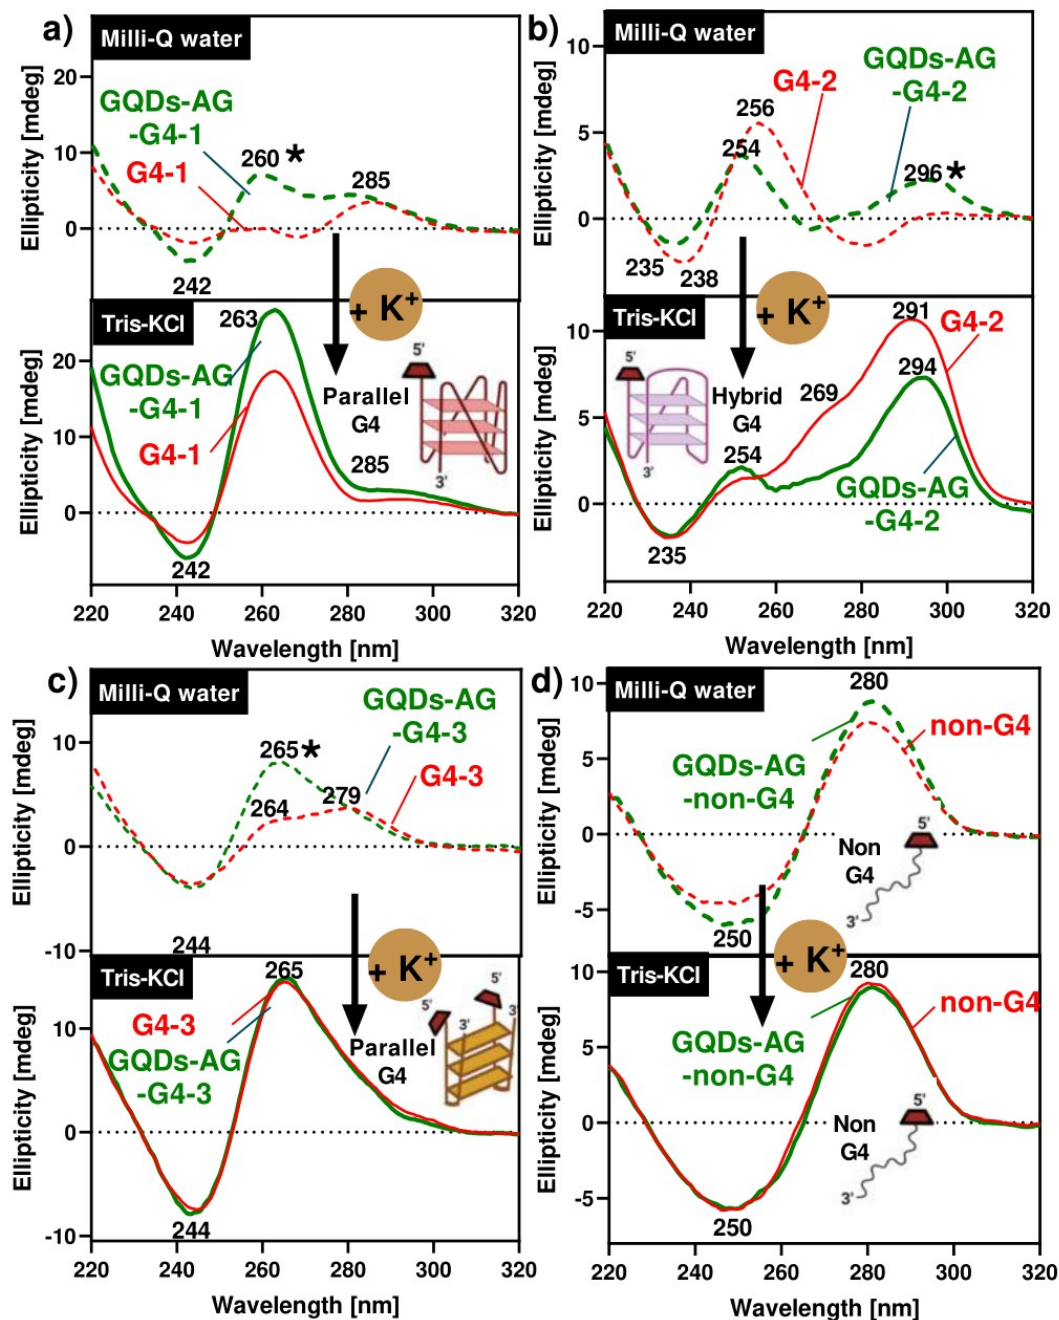

**Fig. S9.** CD spectra in Milli-Q water (top) and Tris-KCl buffer (bottom) of GQDs-AG-DNA arrays and 5'-Phos-DNA (50  $\mu$ M), with respect to the oligonucleotides: a) G4-1, b) G4-2, c) G4-3 and d) non-G4. The experiments were carried out at 20  $^{\circ}$ C.

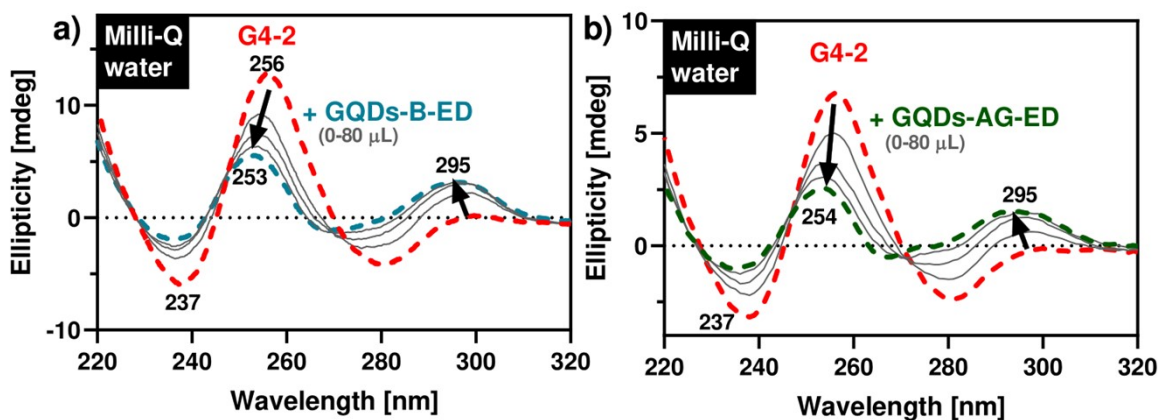

**Fig. S10.** CD spectra in Milli-Q water of G4-2 oligonucleotide (50  $\mu$ M) during successive additions of a) GQDs-B-ED and b) GQDs-AG-ED ( $\sim$  30  $\mu$ g/mL, 0-80  $\mu$ L). The experiments were carried out at 25  $^{\circ}$ C.

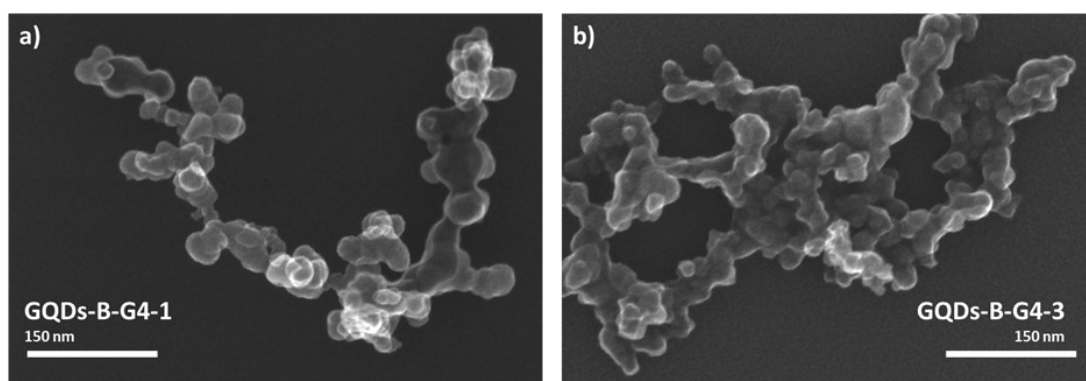

**Fig. S11.** STEM images of a) GQDs-B-G4-1 and b) GQDs-B-G4-3 in Milli-Q water (scanning mode).

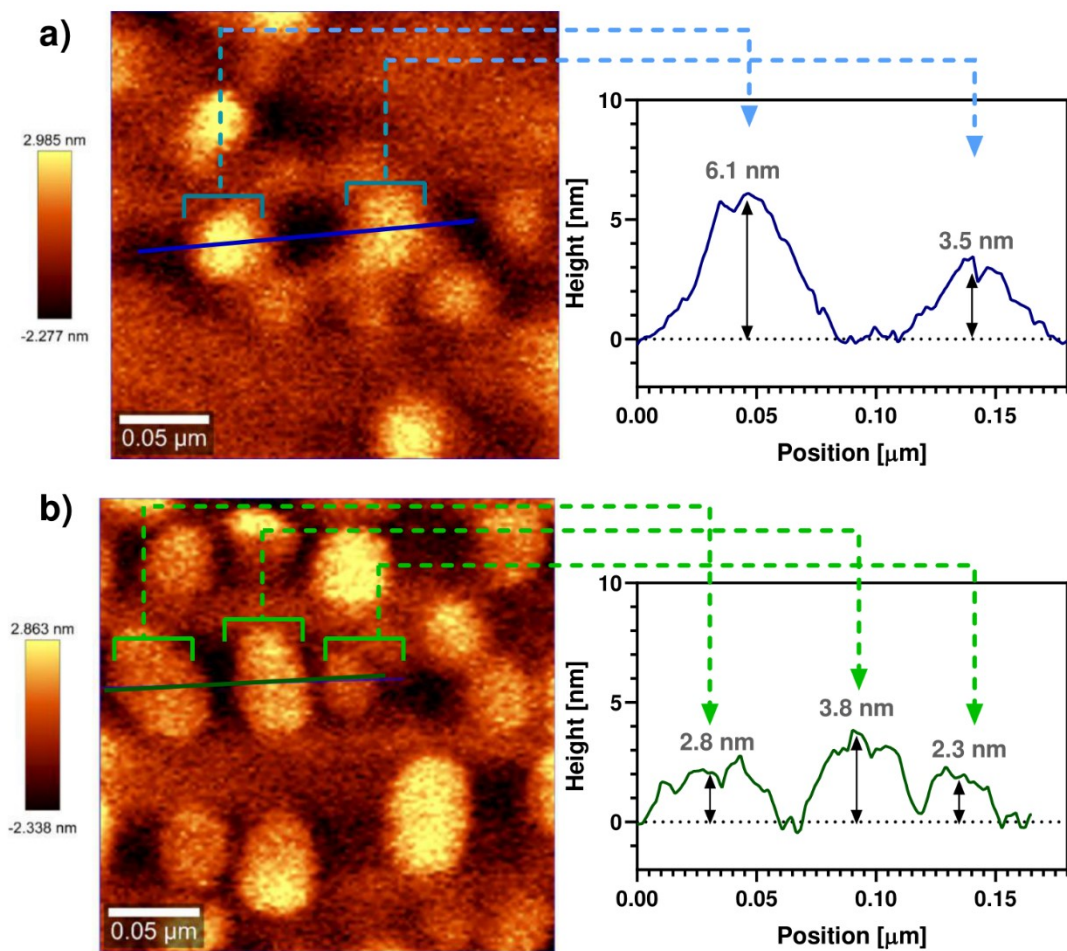

**Fig. S12.** AFM topography images of a) GQDs-B-G4-3 and b) GQDs-AG-DNA. The respective topographic profiles (marked by the blue (a) and green (b) lines in the images) are shown on the left.

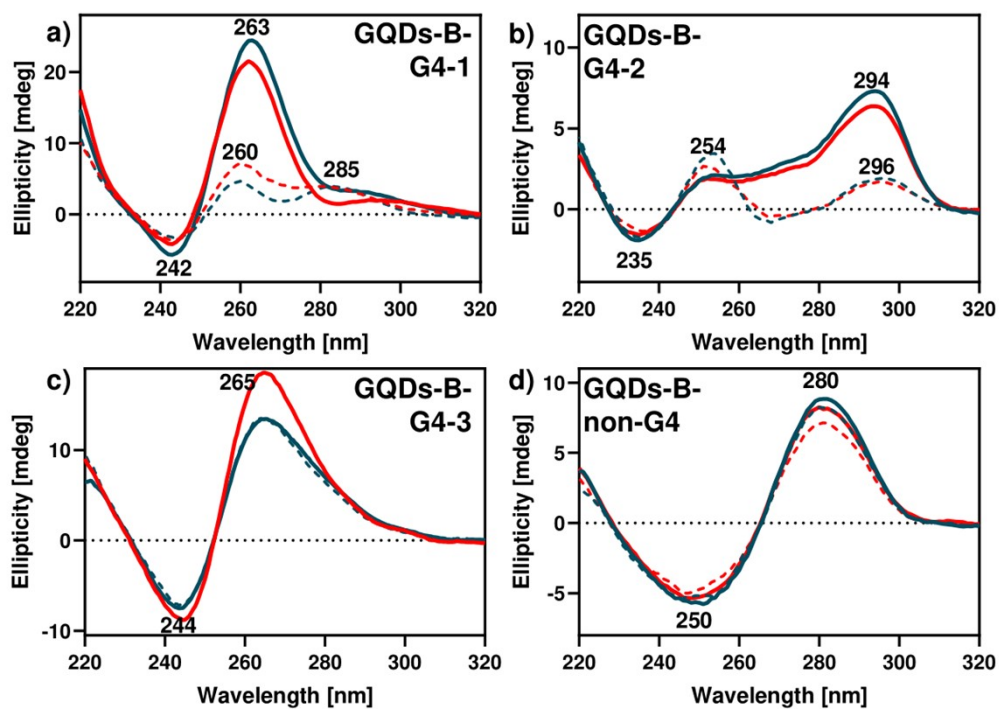

**Fig. S13.** CD spectra of GQDs-B-DNA in Milli-Q water (dashed-line) and Tris-KCl buffer (full-line) 1 day after synthesis (blue) and after 3 days (red). The DNA oligonucleotides from the arrays were a) G4-1, b) G4-2, c) G4-3 and d) non-G4 (50  $\mu$ M). The experiments were carried out at 25  $^{\circ}$ C.

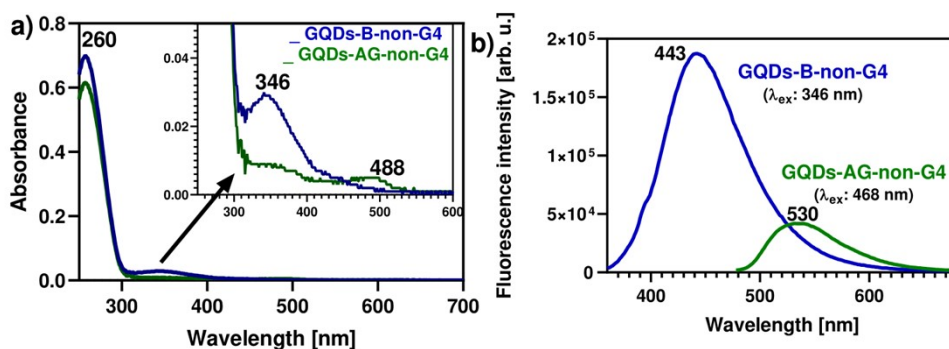

**Fig. S14.** a) Absorbance spectra of GQDs-B/AG-non-G4 and respective b) fluorescence spectra in Milli-Q water at RT.

#### 4. GQDs-DNA bioconjugates as self-indicating TMPyP carriers

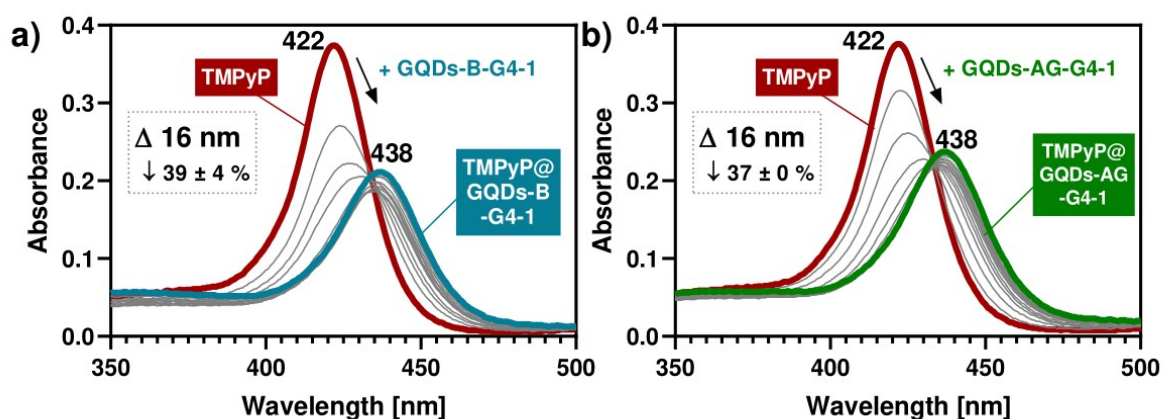

**Fig. S15.** a) UV-VIS spectroscopic titrations of TMPyP (2  $\mu$ M,  $\lambda_{\text{ex}}$  422 nm) with a) GQDs-B-G4-1 and b) GQDs-AG-G4-1 (0-50  $\mu$ L, 50  $\mu$ M) in Tris-KCl at RT.

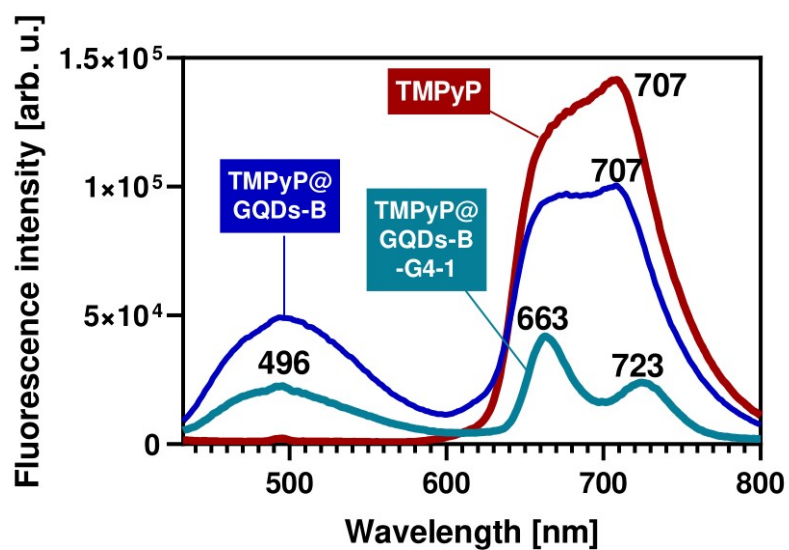

**Fig. S16.** Fluorescence spectra of non-immobilized TMPyP (2  $\mu$ M, red line) and after titration (0-50  $\mu$ L, 50  $\mu$ M) with GQDs-B (dark blue line) and GQDs-B-G4-1 (light blue line) in Tris-KCl ( $\lambda_{\text{ex}}$  422 nm) at RT.



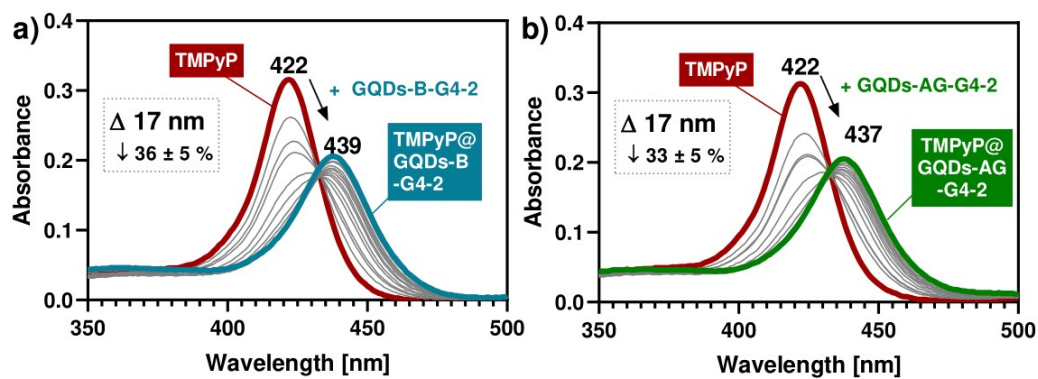

**Fig. S17.** a) UV-VIS spectroscopic titrations of TMPyP (2 μM, λ<sub>ex</sub> 422 nm) with a) GQDs-B-G4-2 and b) GQDs-AG-G4-2 (0-50 μL, 50 μM) in Tris-KCl at RT.

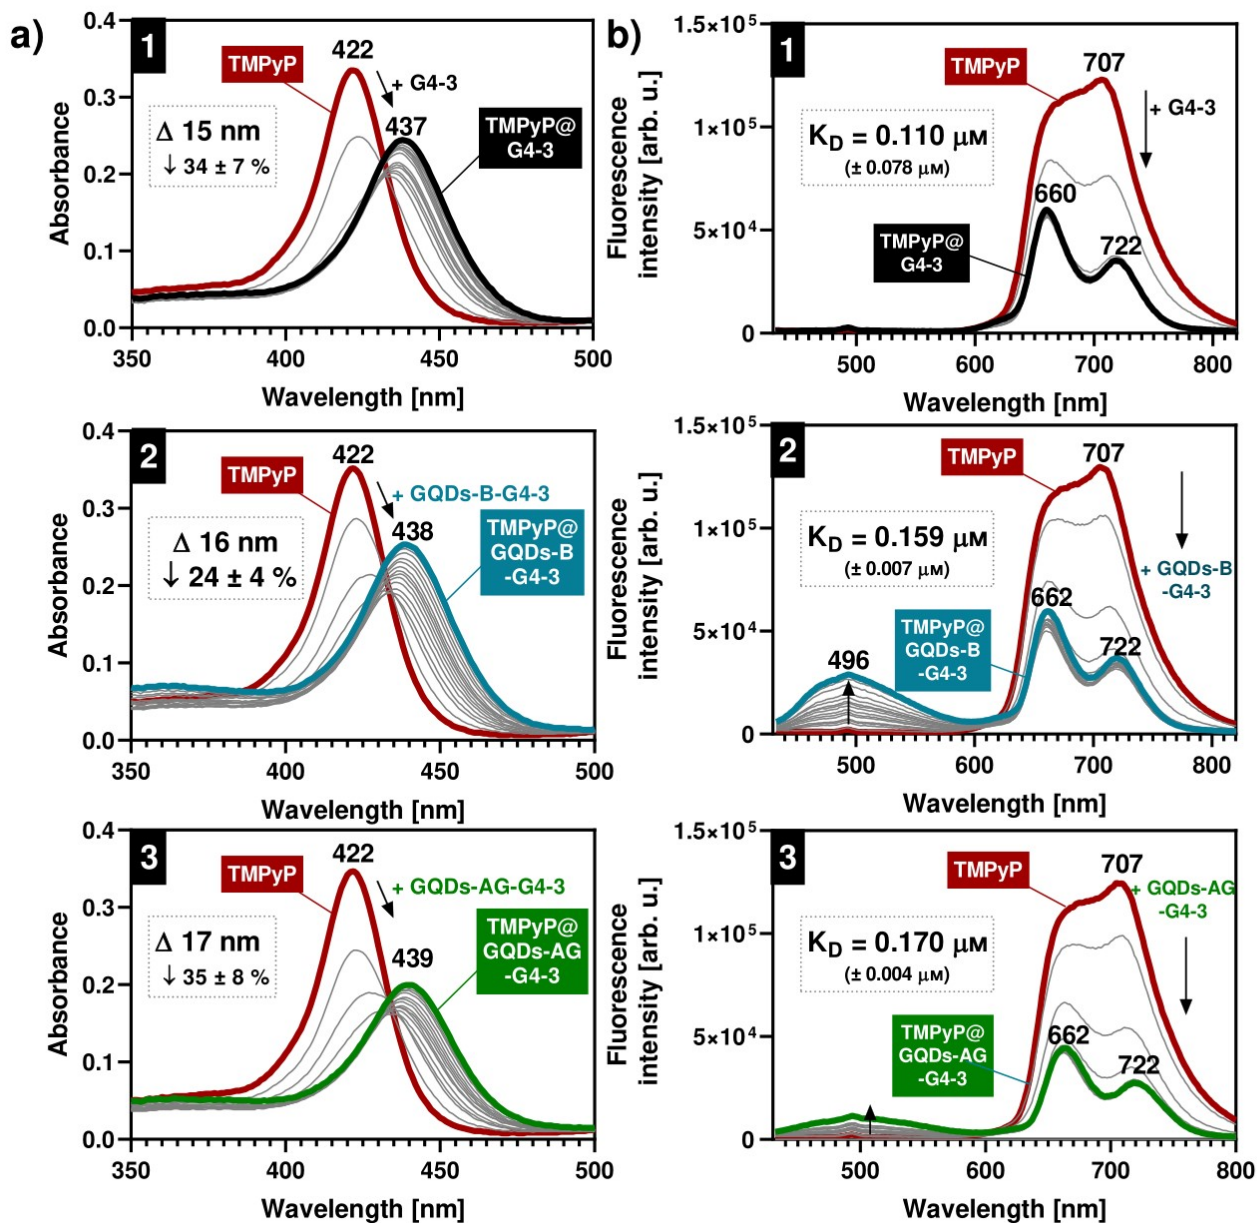

**Fig. S18.** a) UV-VIS spectroscopic and b) spectrofluorimetric titrations of TMPyP (2  $\mu\text{M}$ ,  $\lambda_{\text{ex}}$  422 nm) with G4-3 (1), GQDs-B-G4-3 (2) and GQDs-AG-G4-3 (0-50  $\mu\text{L}$ , 50  $\mu\text{M}$ ) in Tris-KCl at RT.

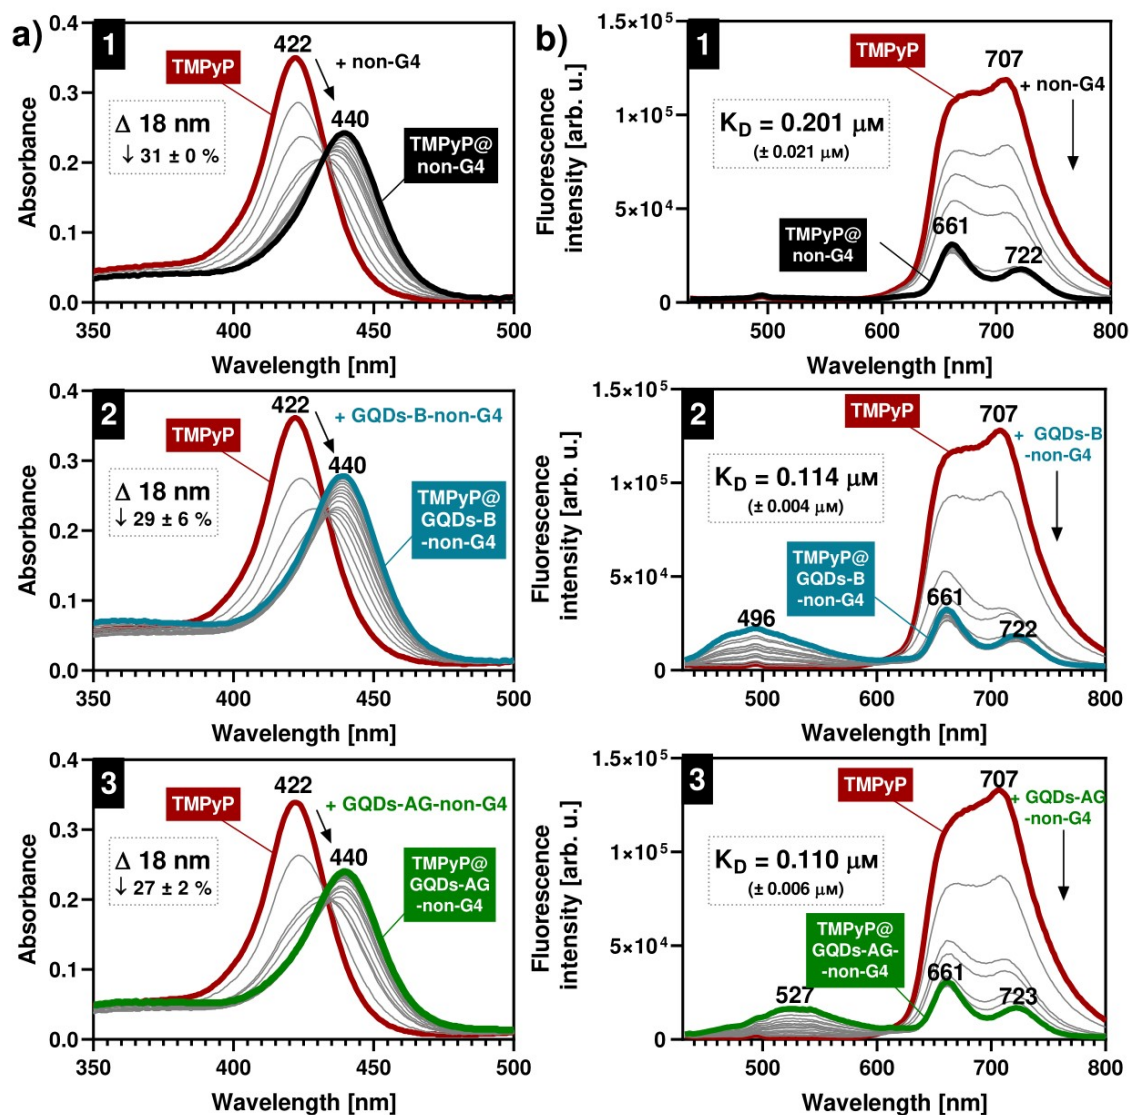

**Fig. S19.** a) UV-VIS spectroscopic and b) spectrofluorimetric titrations of TMPyP (2  $\mu\text{M}$ ,  $\lambda_{\text{ex}}$  422 nm) with non-G4 (1), GQDs-B-non-G4 (2) and GQDs-AG-non-G4 (3) (0-50  $\mu\text{L}$ , 50  $\mu\text{M}$ ) in Tris-KCl at RT.



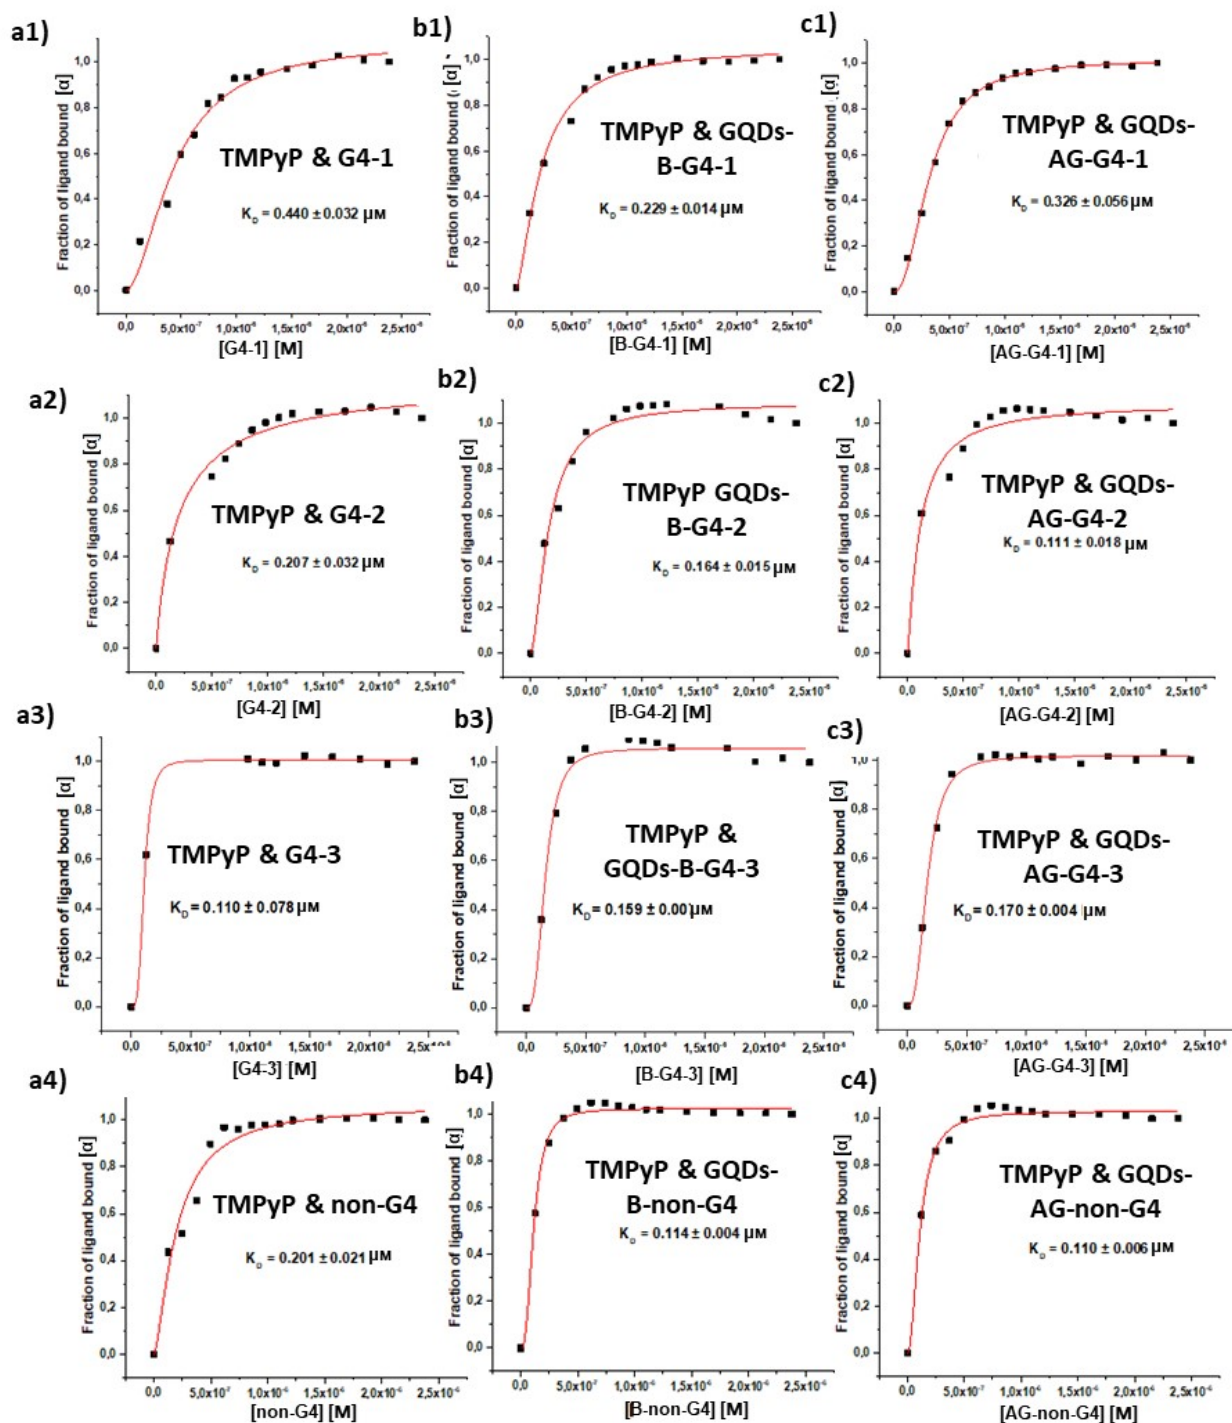

**Fig. S20.** Calculation of the dissociation constants ( $K_D$ ) of TMPyP with a) DNA, b) GQDs-B-DNA and c) GQDs-AG-DNA in Tris-KCl. The DNA oligonucleotides correspond to: 1) G4-1, 2) G4-2, 3) G4-3 and 4) non-G4 (0-50  $\mu\text{L}$ , 50  $\mu\text{M}$ ).

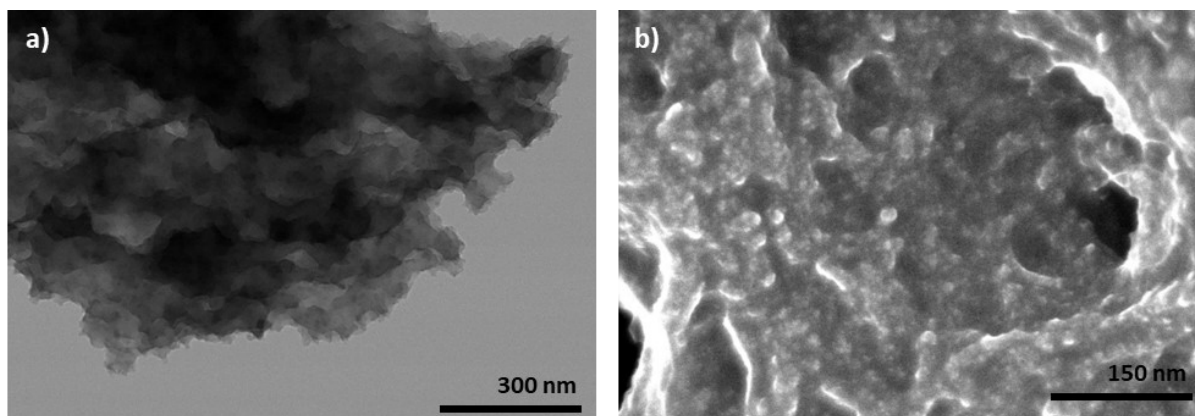

**Fig. S21.** STEM images of TMPyP@GQDs-B-G4-3.

## 5. References

- 1 L. Yang, C. R. De-Jager, J. R. Adsetts, K. Chu, K. Liu, C. Zhang and Z. Ding, *Anal. Chem.*, 2021, **93**, 12409.
- 2 V. A. Chhabra, R. Kaur, N. Kumar, A. Deep, C. Rajesh and K.-H. Kim, *RSC Adv.*, 2018, **8**, 11446.
- 3 S. Piqueras, S. Füchtner, R. Rocha de Oliveira, A. Gómez-Sánchez, S. Jelavić, T. Keplinger, A. de Juan and L. G. Thygesen, *Front. Plant Sci.*, 2020, **10**, 1701.
- 4 M. Baibarac, M. Daescu and S. N. Fejer, *Sci. Rep.*, 2019, **9**, 11968.
- 5 W. H. Danial, B. Farouzy, M. Abdullah and Z. A. Majid, *Mal. J. Chem.*, 2021, **23**, 127.
- 6 T. Tabish, M. Pranjol, D. Horsell, A. Rahat, J. Whatmore, P. Winyard and S. Zhang, *Cancers*, 2019, **11**, 319.
- 7 A. Bokare, D. Nordlund, C. Melendrez, R. Robinson, O. Keles, A. Wolcott and F. Erogbogbo, *Diam. Rel. Mater.*, 2020, **110**, 108101.
